# Supplementary material for: From mononuclear to pyrazine-bridged dinuclear samarium(iii) complexes: role of fluxidentate coordination in luminescent and thermal behavior
Source: Royal Society of Chemistry journal article supplement (doi:10.1039/d6ra00472e), 2026-04-24
Supplement: d6ra00472e1.pdf [file d6ra00472e1.pdf]

## From Mononuclear to Pyrazine-Bridged Dinuclear Samarium(III) Complexes: Role of Fluxidentate Coordination in Luminescent and Thermal Behavior

Vandana Aggarwal<sup>a</sup>, Devender Singh<sup>a, b\*</sup>, Swati Dalal<sup>a</sup>, Shri Bhagwan<sup>a</sup>, Sumit Kumar<sup>c</sup>, Rajender Singh  
Malik<sup>c</sup>, Parvin Kumar<sup>d</sup> and Jayant Sindhu<sup>e</sup>

<sup>a</sup>Department of Chemistry, Maharshi Dayanand University, Rohtak-124001, Haryana, India

<sup>b</sup> Department of Chemistry, Lovely Professional University, Phagwara, Jalandhar, 14441, Punjab, India

<sup>c</sup>Department of Chemistry, DCR University of Science & Technology, Murthal -131039 Haryana, India.

<sup>d</sup>Department of Chemistry, Kurukshetra University Kurukshetra -136119, Haryana, India.

<sup>e</sup>Department of Chemistry, COBS&H, CCS Haryana Agricultural University, Hisar-125004, Haryana, India.

### SUPPLEMENTARY INFORMATION

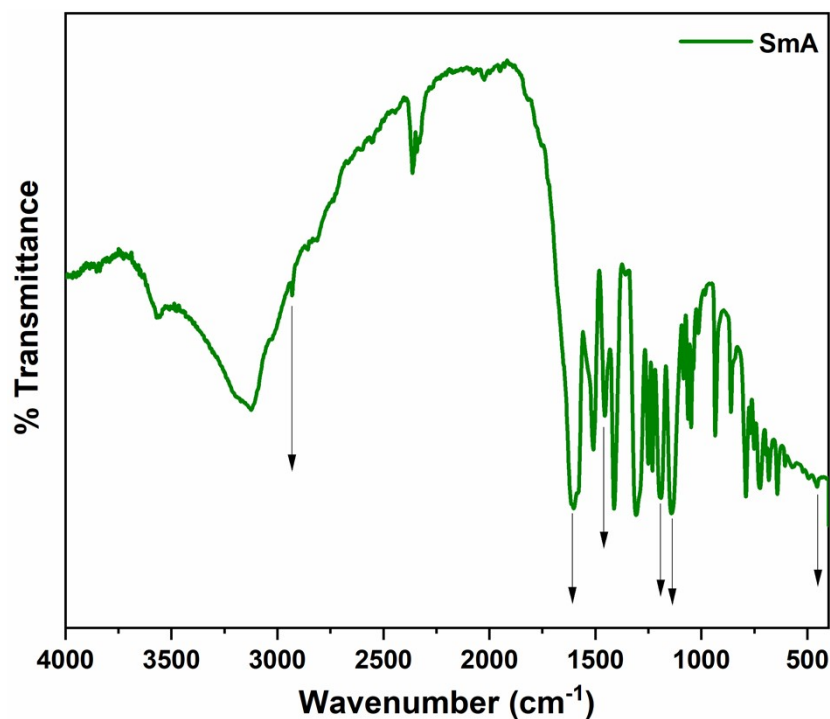

Fig. S1 FTIR spectra of SmA

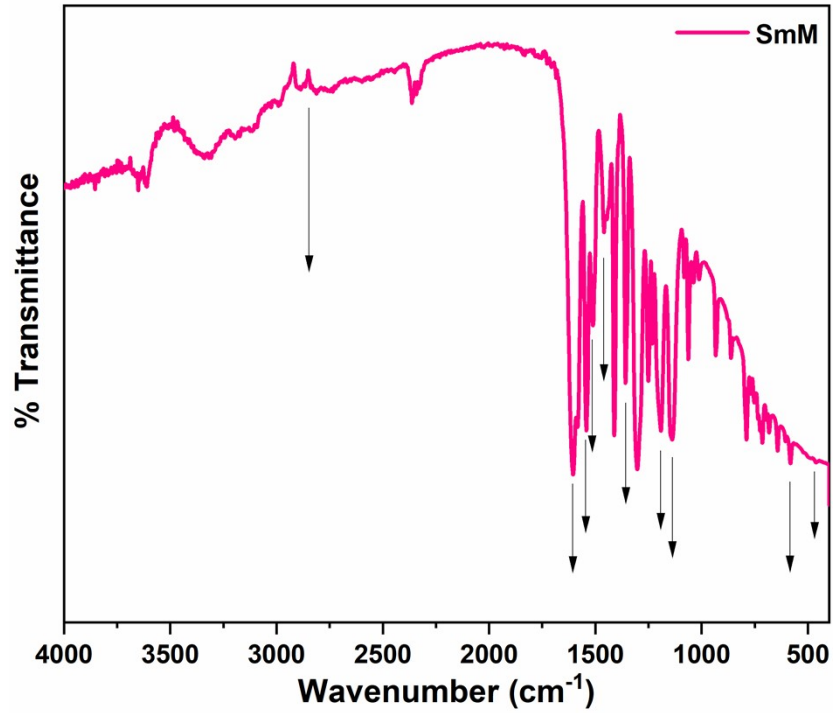

Fig. S2 FTIR spectra of SmM

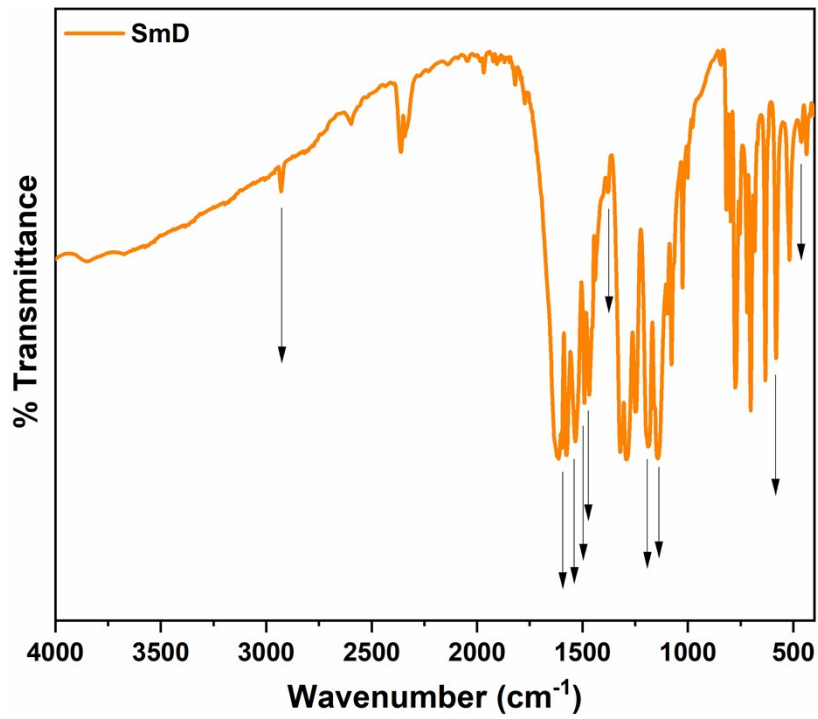

Fig. S3 FTIR spectra of SmD

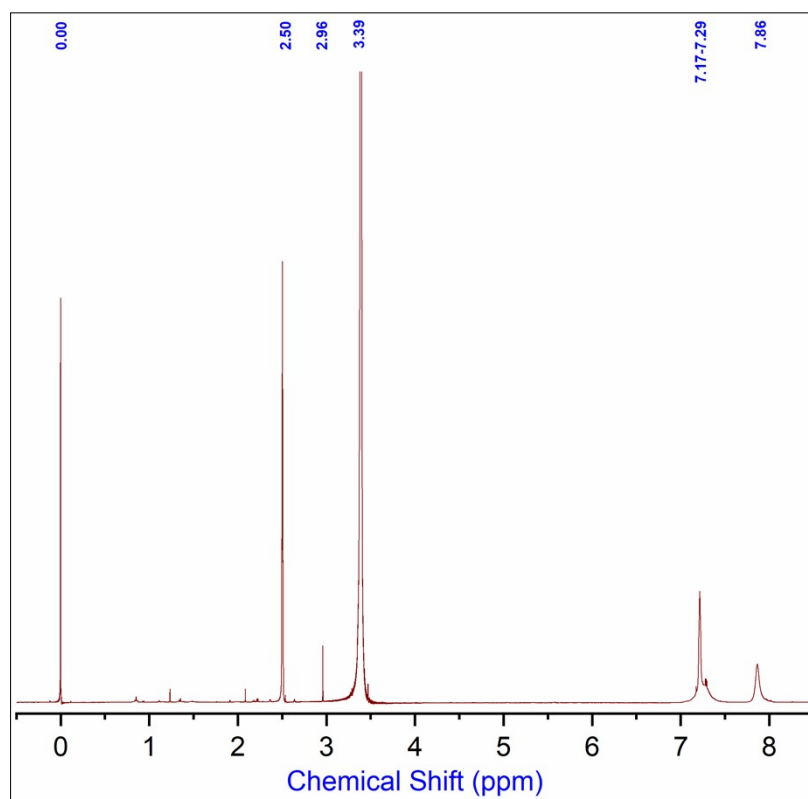

**Fig. S4** Proton NMR spectra of SmA

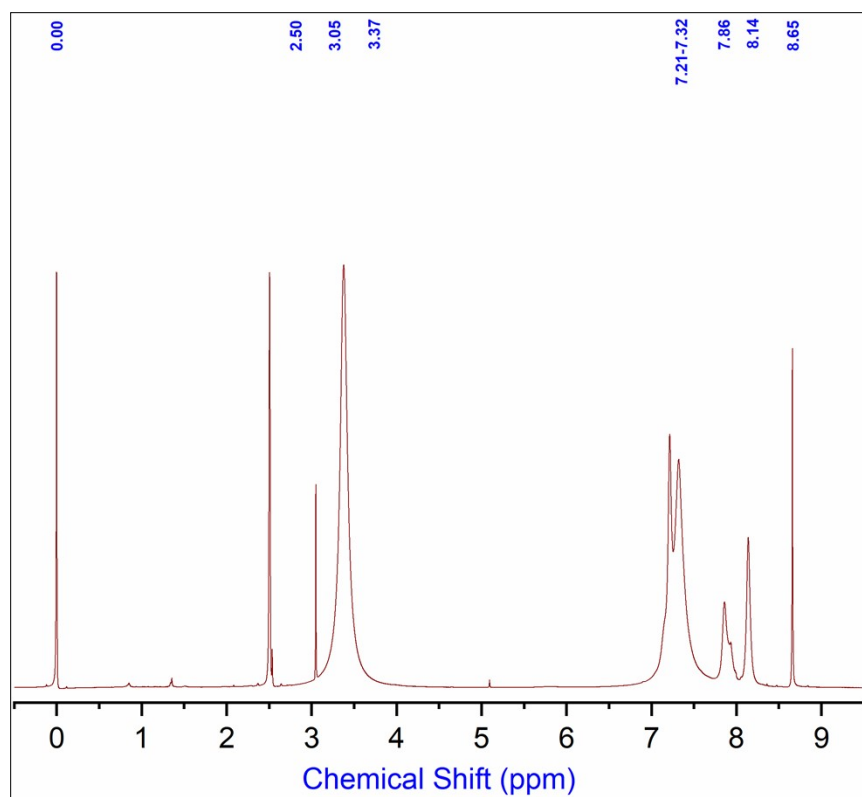

**Fig. S5** Proton NMR spectra of SmM

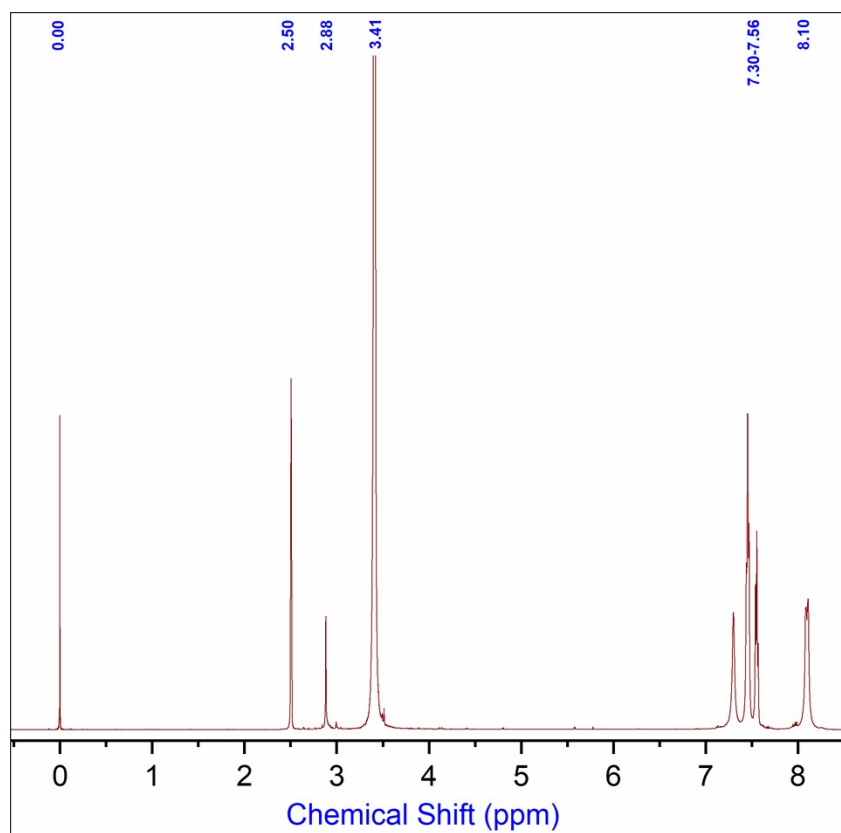

**Fig. S6** Proton NMR spectra of SmD
